# Supplementary material for: Ductal Ngn3-expressing progenitors contribute to adult β cell neogenesis in the pancreas
Source: PubMed Central journal article supplement — Cell Stem Cell. 2021 Nov 4;28(11):2000–2008.e4. doi: 10.1016/j.stem.2021.08.003 (PMC8577827; doi:10.1016/j.stem.2021.08.003), 2021-11-04
Supplement: mmc1.pdf [file mmc1.pdf]

**Cell Stem Cell, Volume 28**

**Supplemental Information**

**Ductal Ngn3-expressing progenitors contribute  
to adult  $\beta$  cell neogenesis in the pancreas**

**Christopher Gribben, Christopher Lambert, Hendrik A. Messal, Ella-Louise Hubber, Chloe Rackham, Ian Evans, Harry Heimberg, Peter Jones, Rocio Sancho, and Axel Behrens**

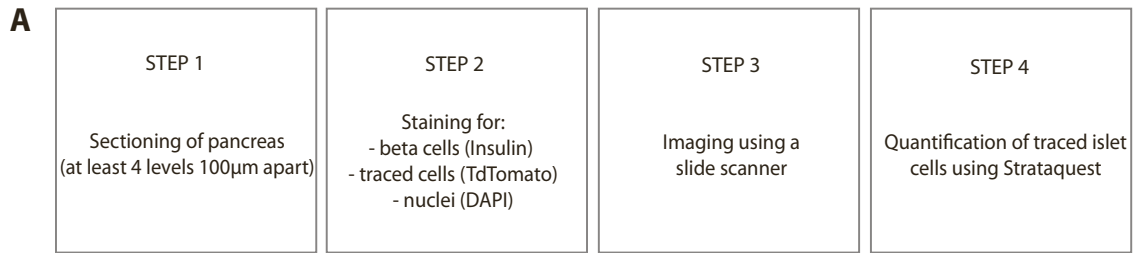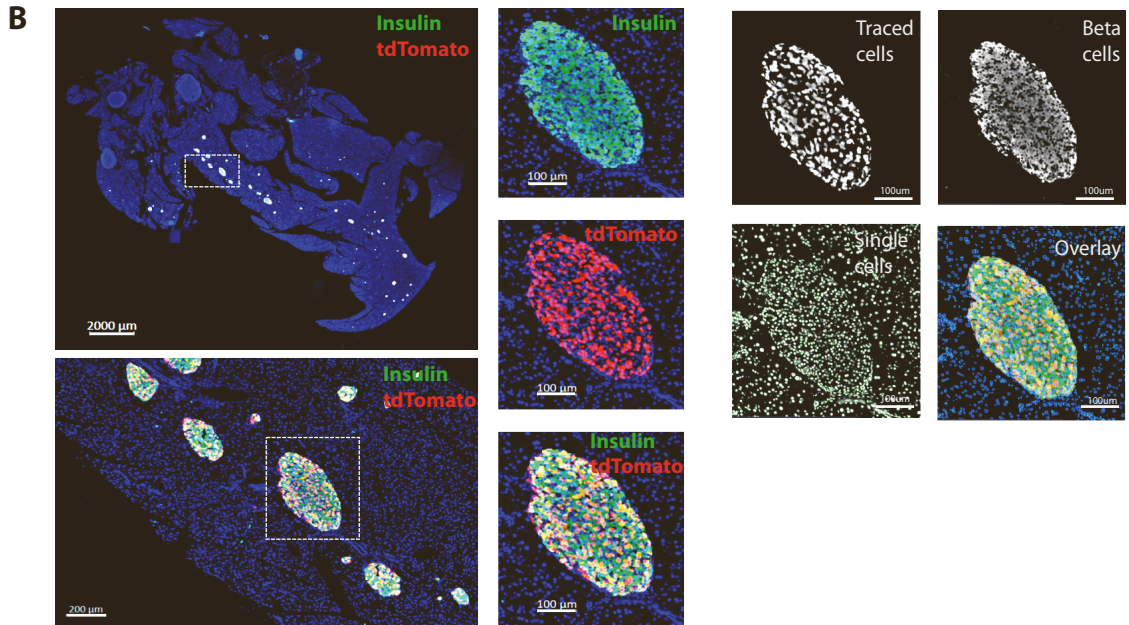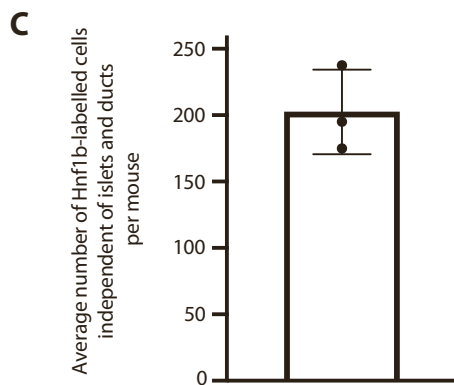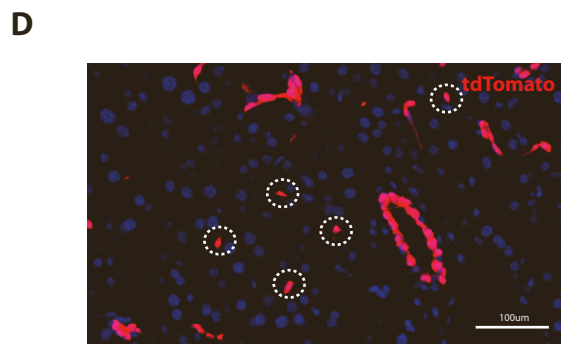

**Figure S1: Scheme of lineage tracing analysis and quantification, related to Figure 1**

- A) Workflow of processing, antibody staining, fluorescent imaging and analysis.
- B) Double IF for Insulin and tdTomato. A scan of a whole pancreas section, where multiple images are stitched together is shown (left upper panel) and high magnifications of an islet (middle panel). An example from an analysis is shown (right panels) where traced cells, INS+ cells and DAPI (for nuclei) are overlaid to allow for the percentage of INS+ islet cells which are traced to be determined..
- C) Quantification of the number of HNF1b-labelled cells independent of islets and ducts in HNF1b-CreERT; tdTomato mice (n= 3 mice) at 1 week post-tamoxifen injection.
- D) tdTomato IF in HNF1b-CreERT; tdTomato mice (n= 3 mice) at 1 week post-tamoxifen injection. Labelled cells independent of ducts and islets are circled with white dashed line.

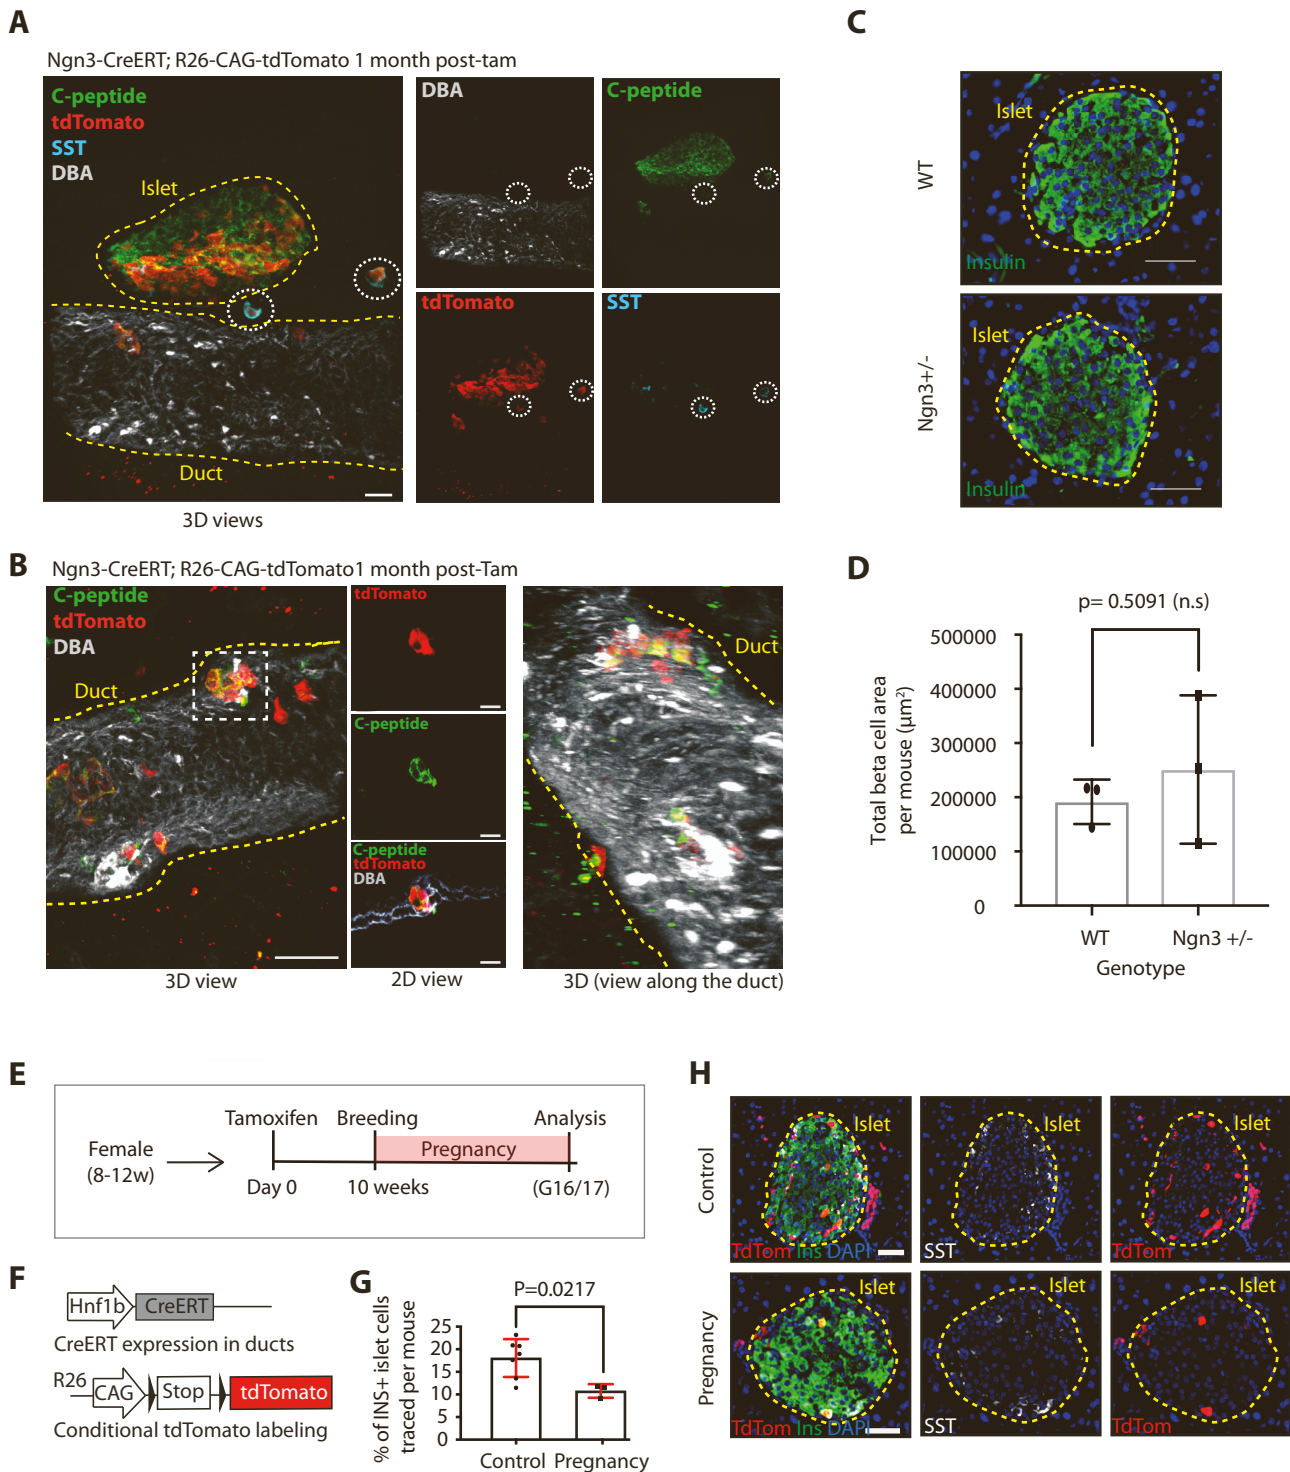

**Figure S2: FLASH imaging of potentially migrating cells between duct and islet, related to Figure 2**

- 3D view following FLASH for tdTomato, C-peptide, tdTomato, SST and DBA of a pancreas from a Ngn3-CreERT; R26-CAG-tdTomato mouse at 1 month post-tamoxifen. Triple positive cells in between the duct and islet are circled. Scale bars, 20µm.
- 3D view following FLASH for tdTomato, C-peptide, tdTomato and DBA of a pancreas from a Ngn3-CreERT; R26-CAG-tdTomato mouse at 1 month post-tamoxifen. Endocrine cell cluster within the duct is indicated by the white dash line. Scale bars, 20µm.
- Immunofluorescence staining for Insulin in WT and Ngn3<sup>+/-</sup> mice pancreas. Scale bars, 50µm.
- Quantification of the beta cell area in WT and Ngn3<sup>+/-</sup> mice pancreas. N=3 for WT and Ngn3<sup>+/-</sup>.
- Schematic of experimental strategy to analyse the contribution of ductal cells to islets during pregnancy.
- Schematic of the lineage tracing strategy.
- Quantification of the percentage of INS<sup>+</sup> islet cells traced per mouse in either mice at gestational day 16-17 of pregnancy or non-pregnant mice. Control N=7 mice, Pregnant N=3 mice.
- Triple IF for Insulin (Ins), Somatostatin (Sst) and tdTomato (tdTom) in representative islets from control or pregnant mice. Scale bars, 50µm.

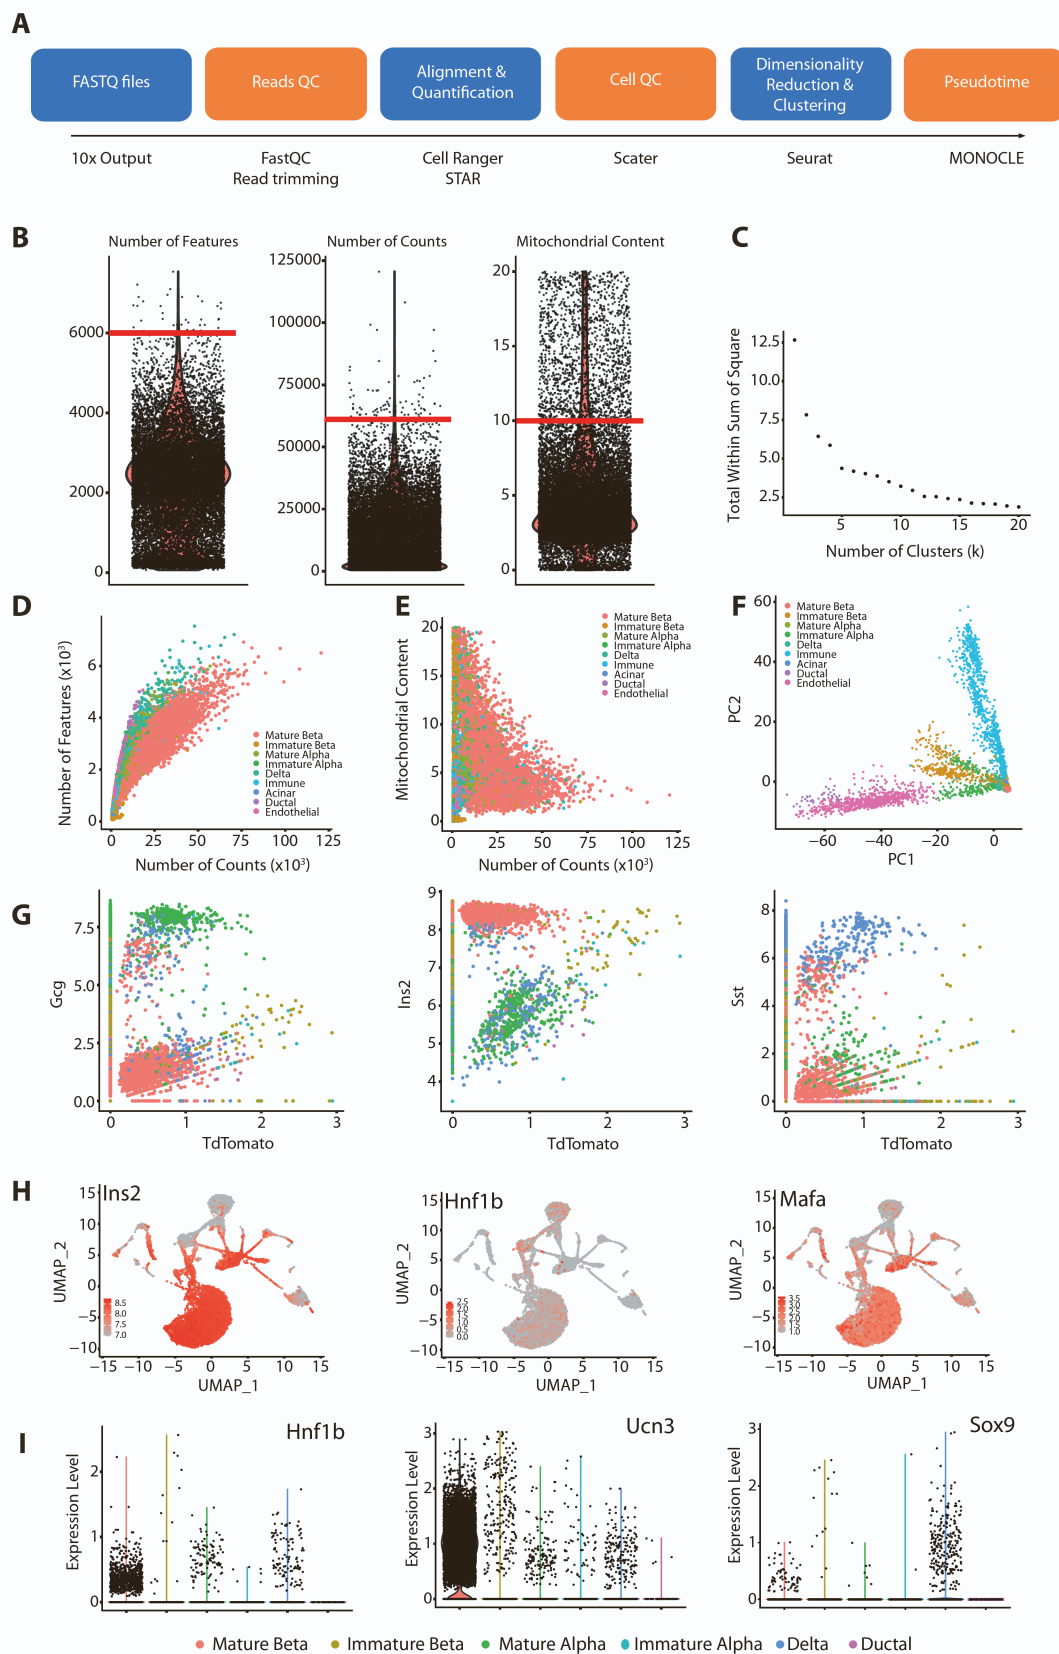

**Figure S3: Analysis and validation of single-cell RNAseq data, related to Figure 4**

- Schematic of workflow for scRNAseq data analysis.
- Cell quality control assessing number of features, count number and mitochondrial content. Red line indicate cutoff values.
- Validation of unsupervised clustering by scree plot ( $k=10$ ).
- Number of detected features plotted against number of counts.
- Mitochondrial content plotted against number of counts.
- Principal component analysis of cells passing QC metrics.
- Feature plots of traced cells against non-traced equivalents for Gcg, Ins2 and Sst expression.
- UMAP plots of Ins2, Hnf1b and MafA across scRNAseq data set.
- Violin plots showing Hnf1b, Ucn3 and Sox9 expression per cluster

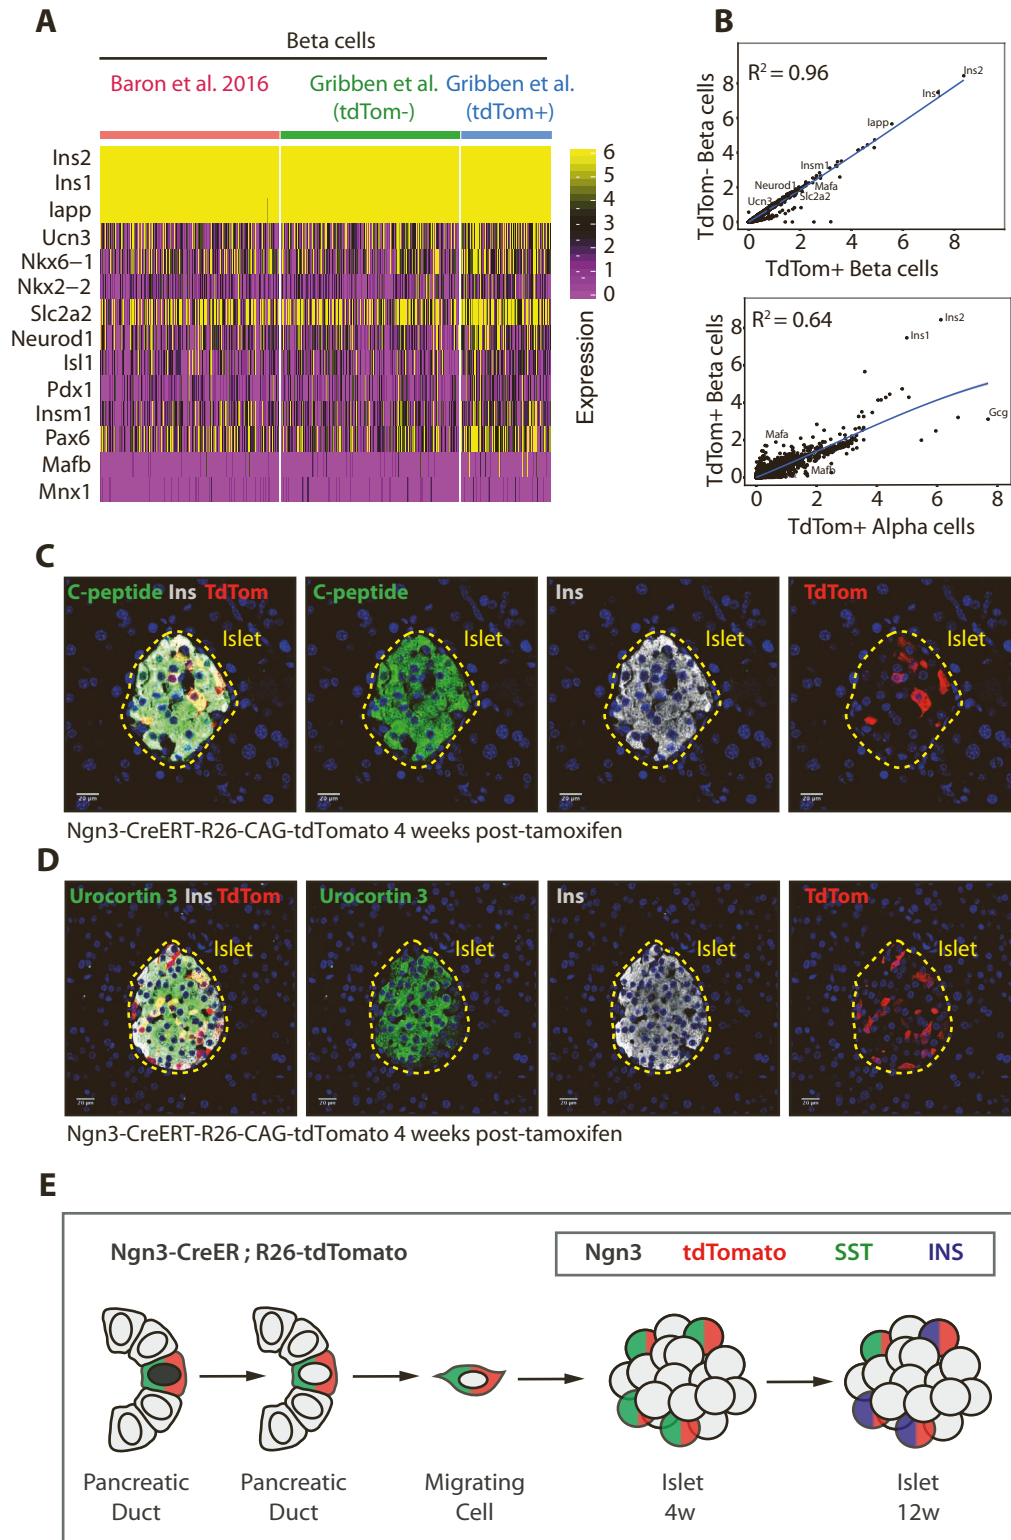

**Figure S4: Analysis of tdTomato+ beta cells in Ngn3CreERT; R26-CAG-tdTomato mice, related to Figure 4.**

- (A) Heatmap showing equivalent expression of beta cell markers across Baron dataset and non-traced and traced beta cells from our study.
- (B) Correlation analysis of tdTomato- and tdTomato+ (top) beta cells and tdTomato+ Alpha and tdTomato+ Beta cells
- (C) Triple IF for Insulin, C-peptide and tdTomato in Ngn3CreERT; R26-CAG-tdTomato mice at 4 weeks post-tamoxifen. A representative islet is shown.
- (D) Triple IF for Insulin, C-peptide and tdTomato in Ngn3CreERT; R26-CAG-tdTomato mice at 4 weeks post-tamoxifen. A representative islet is shown.
- (E) Proposed model for Ngn3+ ductal cell to beta cell differentiation.



## Supplementary table 1

### InsCreERT experiment

| Time post-tamoxifen | Male/Female | Age when injected |
|---------------------|-------------|-------------------|
| 1m                  | Male        | 20 weeks          |
| 1m                  | Male        | 26 weeks          |
| 1m                  | Female      | 17 weeks          |
| 1m                  | Female      | 17 weeks          |
| 6m                  | Male        | 21 weeks          |
| 6m                  | Female      | 10 weeks          |
| 6m                  | Male        | 18 weeks          |
| 6m                  | Male        | 18 weeks          |

### Hnf1bCreERT experiment

| Time post-tamoxifen | Male/Female | Age when injected |
|---------------------|-------------|-------------------|
| 1 week              | Male        | 12 weeks          |
| 1 week              | Male        | 8 weeks           |
| 1 week              | Male        | 8 weeks           |
| 1 week              | Male        | 8 weeks           |
| 5 weeks             | Male        | 16 weeks          |
| 5 weeks             | Female      | 16 weeks          |
| 5 weeks             | Male        | 16 weeks          |
| 5 weeks             | Female      | 16 weeks          |
| 12 weeks            | Male        | 10 weeks          |
| 12 weeks            | Female      | 10 weeks          |
| 12 weeks            | Female      | 8 weeks           |
| 12 weeks            | Male        | 12 weeks          |
| 12 weeks            | Female      | 10 weeks          |
| 12 weeks            | Female      | 10 weeks          |

### Ngn3CreERT experiment

| Time post-tamoxifen | Male/Female | Age when injected |
|---------------------|-------------|-------------------|
| 1 week              | Male        | 43 weeks          |
| 1 week              | Female      | 23 weeks          |
| 1 week              | Female      | 22 weeks          |
| 4 weeks             | Female      | 12 weeks          |
| 4 weeks             | Female      | 16 weeks          |
| 4 weeks             | Male        | 12 weeks          |

### Ngn3CreERT experiment single cell RNAseq

| Time post-tamoxifen | Male/Female | Age when injected |
|---------------------|-------------|-------------------|
| 10 days             | Female      | 10 weeks          |
| 10 days             | Female      | 10 weeks          |
| 10 days             | Male        | 12 weeks          |
| 10 days             | Male        | 12 weeks          |
| 10 days             | Female      | 12 weeks          |
| 10 days             | Female      | 12 weeks          |

### Ngn3CreERT Akita ducts quantification

| Cohort                     | Male/Female | Age when injected |
|----------------------------|-------------|-------------------|
| Akita tam injected         | Male        | 13 weeks          |
| Akita tam injected         | Male        | 13 weeks          |
| Akita tam injected         | Female      | 34 weeks          |
| WT                         | Male        | 43 weeks          |
| WT                         | Female      | 23 weeks          |
| WT                         | Female      | 22 weeks          |
| Akita no tamoxifen control | Male        | 15 weeks          |
| Akita no tamoxifen control | Male        | 15 weeks          |
| Akita no tamoxifen control | Male        | 15 weeks          |
| Akita no tamoxifen control | Male        | 15 weeks          |

**Supplementary table 1. Details of mice included in lineage tracing experiments, related to Figures 1-4.**

## Supplementary table 2

| Lineage tracing experiment | Average number of islet cells analysed per section |
|----------------------------|----------------------------------------------------|
| Hnf1bCreERT                | 1960                                               |
| Ngn3CreERT                 | 2130                                               |
| InsCreERT                  | 2854                                               |

**Supplementary table 2. Details of the number of islets counted per lineage tracing experiment, related to Figures 1 and 2.**
